# Supplementary material
Source: PubMed Central journal article supplement (PMC3220554)
Supplement: supp_M111.275255_jbc.M111.275255-1.pdf [file supp_M111.275255_jbc.M111.275255-1.pdf]

## Supplemental Figures legends

### Figure S1. Cell sorting and cloning.

(A) Cell sorting of transfected RK13 labelled with specific antibodies coupled with fluorescent secondary antibodies. Y-axis represents the antibody labelling intensity. X-axis (FSC-H) measures the size of the cell. Controls with no primary antibody or with M2 used on untransfected RK13 are included. Indicated gates and percentages were used for cell sorting and cloning into 96-well plates. (B) Representative Western blots used for selecting expressing clones. For H2H3 clones, the last lane was loaded with a mixture of recombinant PrP and H2H3. (C) Comparison of the expression of the selected clones using the common antibody Pri-917, after PNGase F treatment. 20 µg of proteins from cell lysate were loaded. E10, B7 and D3 clones expression could not be detected. As a reference, a serial dilution of known amounts of recombinant PrP and H2H3 were loaded.

### Figure S2. A11 labelling on confluent cells.

100% confluent F6 cells labelled with A11 antibody. Nuclei were stained with DAPI. Nuclear diffuse staining was observed with A11.
