# Supplementary material
Source: PubMed Central journal article supplement (PMC3220554)

Figure S1

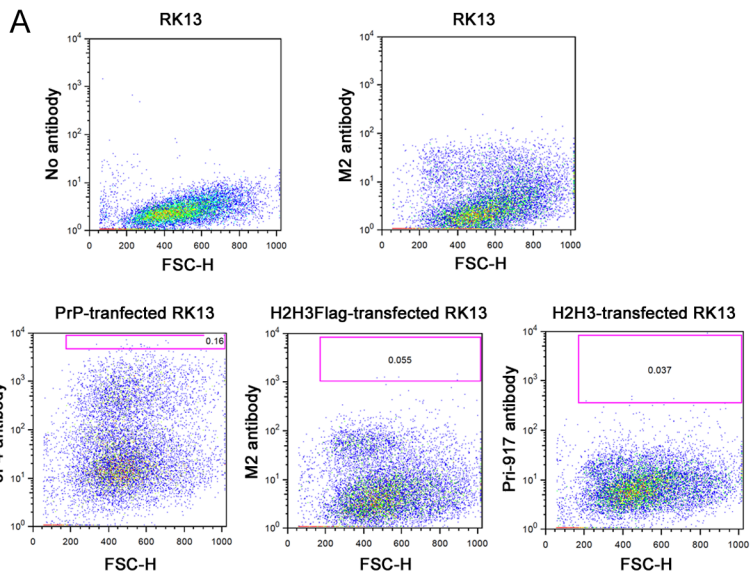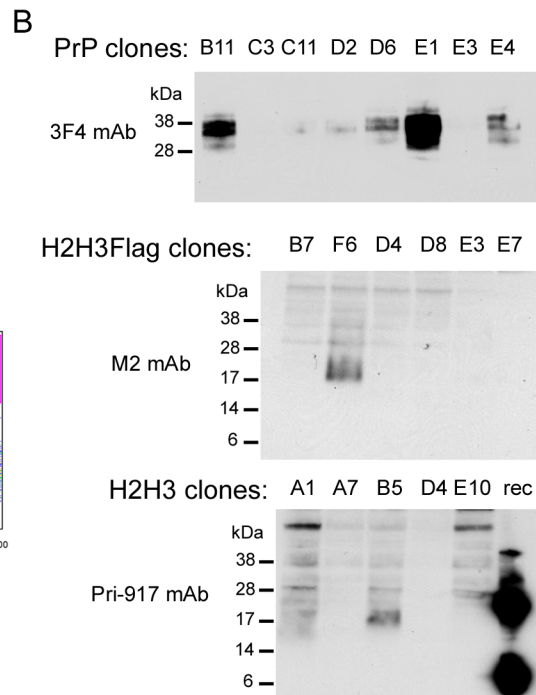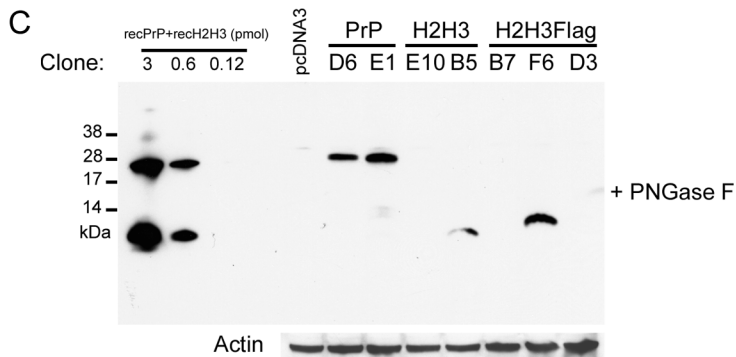

Supplement: supp_M111.275255_jbc.M111.275255-2.pdf [file supp_M111.275255_jbc.M111.275255-2.pdf]

# Figure S2

100% confluent F6 cells

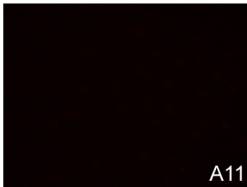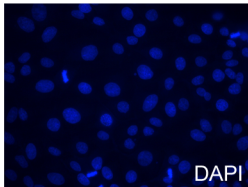

Supplement: supp_M111.275255_jbc.M111.275255-3.pdf [file supp_M111.275255_jbc.M111.275255-3.pdf]
